# Supplementary material
Source: PubMed Central journal article supplement (PMC1924821)
Supplement: mbc_E07-02-0153_1.pdf [file mbc_E07-02-0153_1.pdf]

## Supplementary Information

**Supplementary Figure 1:** Sequence alignment of UBA-Mex67 (residues 533-599) with UBA or CUE domains of human and *S cerevisiae* proteins previously reported to bind ubiquitin. Secondary structure of UBA-Mex67 is reported above the sequence data. Residues contributing to the putative hydrophobic cores of the respective domains are highlighted in grey. Residues found to interact with ubiquitin in the Ede1p UBA-monoubiquitin complexes are highlighted in orange. The region deleted in  $\Delta H4$  is shown in red.
